# Supplementary material for: Comparative Transcriptomic Analysis Revealing the Potential Mechanisms of Erythritol-Caused Mortality and Oviposition Inhibition in Drosophila melanogaster
Source: MDPI journal article supplement (doi:10.3390/ijms25073738), 2024-03-27
Supplement: s1 [file s1]

| Gene name     | Forward                | Reverse                |
|---------------|------------------------|------------------------|
| <i>FoxK</i>   | GTTGGTGGTGGTGGTGGAGTA  | GTGGTGTGGATGCTGCTGTTG  |
| <i>Amyrel</i> | GCTGGTGGGACAATGGAGACA  | CGGCAGGCAGACAGGTATTCA  |
| <i>Dec</i>    | TCGCAAGAGGCACAGATGAAGA | GGCATTTCGGAACCAGAGGAGA |
| <i>Mal-A2</i> | GGAGGCGATTACGGGTTCT    | ACATCCTTGGCGGTGGAGTATC |
| <i>Mal-A3</i> | GGCAAGGTGGTCAACGGAATC  | GGCGTGGAATTGGTGGAGGTA  |
| <i>Mal-A4</i> | CGCAACGATTGGACCAACGAT  | GCTCATCACCGCCATTGTCAG  |
| <i>Mal-B1</i> | TCGCAGGGTCTTCGCTTTCA   | CGCCACAAGGACACTCAATCG  |
| <i>Psd</i>    | CGGTGGATGTGGTCAGAACAAC | CTACATAGCCTGCATCGCCATC |
| <i>Vm26Aa</i> | CCTTCGTGTGCATCGCTCTG   | AGGTCACCGAATCCCTGTCC   |
| <i>Vm26Ab</i> | TGGCATTCAACTTTGGTCACCT | GCGACACACGGATGTTCTCG   |
| <i>Vm26Ac</i> | CGCAGCTACGACCAGGATGA   | CTTGATAACCGCTTCGCAGGAG |
| <i>Vm26Ca</i> | AGTGCATCGCCATCGTCTCC   | TTGCCGTAGCCACCACCGTA   |
